# Supplementary material
Source: PubMed Central journal article supplement (PMC8087752)
Supplement: 12250_2020_289_MOESM1_ESM.pdf [file 12250_2020_289_MOESM1_ESM.pdf]

## Electronic Supplementary Material

### Novel SFTSV Phylogeny Reveals New Reassortment Events and Migration Routes

Xiaoli Wu<sup>1,2</sup> • Mingyue Li<sup>3</sup> • Yanfang Zhang<sup>1</sup> • Boyun Liang<sup>3</sup> • Junming Shi<sup>1,2</sup> • Yaohui Fang<sup>1,2</sup> • Zhengyuan Su<sup>1</sup> • Mengmeng Li<sup>3</sup> • Wenjing Zhang<sup>3</sup> • Ling Xu<sup>3</sup> • Jun Wang<sup>1</sup> • Qiaoli Wu<sup>1</sup> • Shuang Tang<sup>1</sup> • Hualin Wang<sup>1</sup> • Tao Zhang<sup>1</sup> • Cheng Peng<sup>3</sup> • Xin Zheng<sup>3</sup>✉ • Fei Deng<sup>1</sup>✉ • Shu Shen<sup>1</sup>✉

1. State Key Laboratory of Virology and National Virus Resource Center, Wuhan Institute of Virology, Chinese Academy of Sciences, Wuhan 430071, China

2. University of Chinese Academy of Sciences, Beijing 100049, China

3. Department of Infectious Diseases, Institute of Infection and Immunology, Union Hospital, Tongji Medical College, HuaZhong University of Science and Technology, Wuhan 430022, China

Supporting information to DOI: 10.1007/s12250-020-00289-0

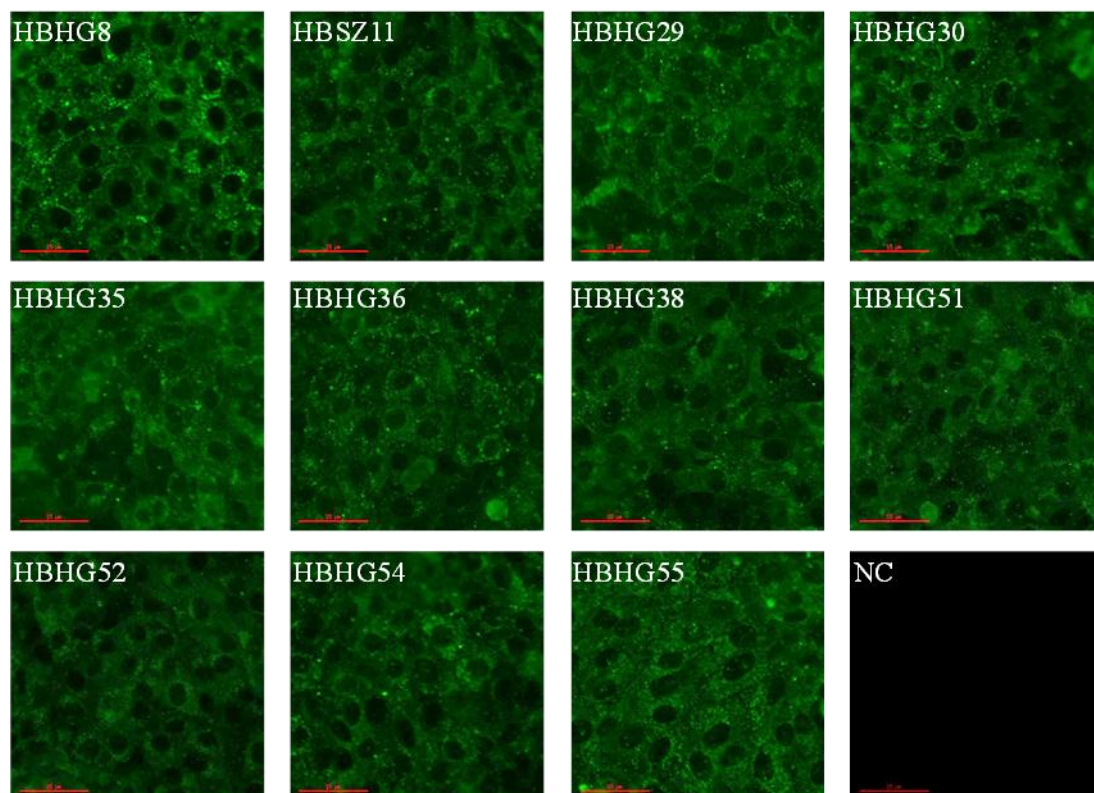

**Fig. S1** Immunofluorescence assay of the new SFTSV strains isolated by blind passages. NC, negative control (uninfected Vero cells). Bars: 15  $\mu$ m.

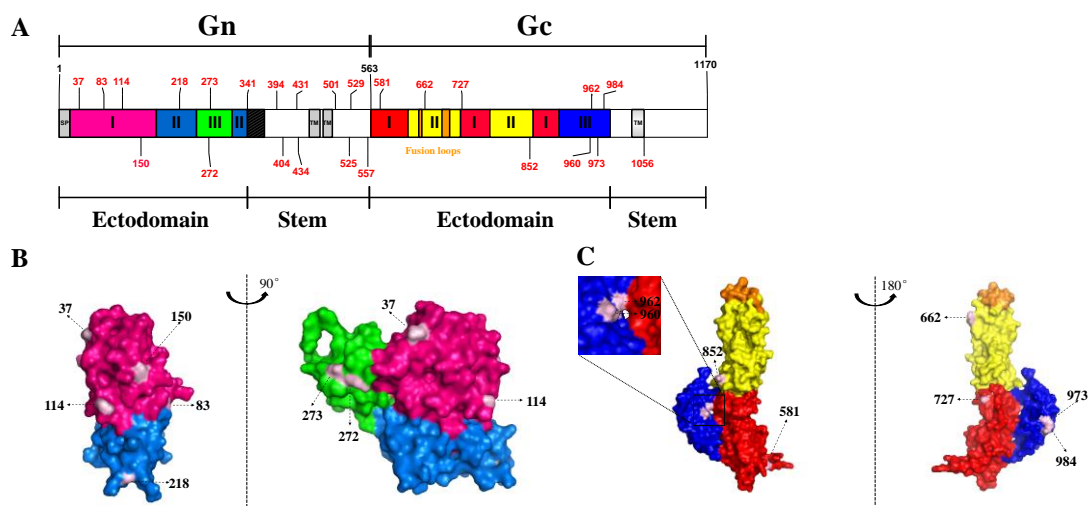

**Fig. S2** Hotspot sites on GP. (A) Hotspot sites in the Gn and Gc domains. Hotspot positions are labeled in red. (B, C) Hotspot sites mapped in the 3D structures of (B) Gn and (C) Gc, respectively.

**Table S1.** Summary of the personal information of the 54 suspected SFTS patients enrolled in this study.

|              |                | Patients (%) |
|--------------|----------------|--------------|
| <b>Total</b> |                | <b>54</b>    |
| Age          | 34–77          |              |
| Gender       | Female         | 28(51.9)     |
|              | Male           | 26(48.1)     |
| Outcome      | Survived       | 47(87.0)     |
|              | Fatal          | 3(5.6)       |
|              | Others         | 4(7.4)       |
| Location     | Hubei Province |              |
|              | Huanggang      | 26(48.1)     |
|              | Suizhou        | 10(18.5)     |
|              | Xiaogan        | 6(11.1)      |
|              | Jingmen        | 1(1.9)       |
|              | Wuhan          | 1(1.9)       |
|              | Henan Province |              |
| Occupation   | Xinyang        | 10(18.5)     |
|              | Farmer         | 26(48.1)     |
|              | Others         | 28(51.9)     |

**Table S2** Clinical features of the 11 SFTS patients that SFTSV was isolated from their serum samples.

| Blood count             | Case1 | Case2 | Case3 | Case4 | Case5 | Case6 | Case7  | Case8 | Case9 | Case10 | Case11 | Normal range |
|-------------------------|-------|-------|-------|-------|-------|-------|--------|-------|-------|--------|--------|--------------|
| PLT ( $\times 10^9/L$ ) | 79↓   | 52↓   | 39↓   | 57↓   | 40↓   | 115   | 83↓    | 21↓   | 10↓   | 88↓    | 51↓    | 100-300      |
| WBC ( $\times 10^9/L$ ) | 1.54↓ | 6.98  | 2.81↓ | 2.26↓ | 2.46↓ | 6.99  | 12.5↑  | 5.39  | 5.04  | 5.29   | 1↓     | 4-9          |
| ALT (U/L)               | 43↑   | 300↑  | 57↑   | 141↑  | 195↑  | 273↑  | 185↑   | 21    | 719↑  | 123↑   | 82↑    | 5-40         |
| AST (U/L)               | 61↑   | 406↑  | 85↑   | 478↑  | 792↑  | 407↑  | 1202↑  | 27    | 2652↑ | 185↑   | 457↑   | 8-40         |
| LDH (U/L)               | 526↑  | 484↑  | 625↑  | 1612↑ | 3336↑ | N/A   | 11098↑ | 482↑  | 2838↑ | 774↑   | 1681↑  | 135-215      |
| CK (U/L)                | 343↑  | 66    | 477↑  | 1418↑ | 3699↑ | N/A   | 2184↑  | 109   | 4097↑ | 130    | 20162↑ | 18-198       |
| CKMB (U/L)              | N/A   | 18↑   | N/A   | 64↑   | 22.4↑ | N/A   | 6.2    | 2.2   | 28↑   | 24↑    | N/A    | 0-6          |

PLT, platelets:  $100-300 \times 10^9/L$ ; WBC, white blood cells:  $4-9 \times 10^9/L$ ; ALT, alanine aminotransferase: 5-40U/L; AST, aspartate transaminase: 8-40U/L; LDH, lactate dehydrogenase: 135-215U/L; CK, creatine kinase: 18-198U/L; CKMB, creatine kinase isoenzyme: 0-6U/L; Clinical parameters lower than the normal range are indicated by “↓”, higher than the normal range are indicated by “↑”.

**Table S3.** Accession numbers and geographical data of SFTSV strains used in this study.

**Table S4.** Visual comparison of the strain placement discrepancies in the different phylogenetic trees.

| Inconsistent segment | Strain                           | Location | Date    | Genotypes |    |    |
|----------------------|----------------------------------|----------|---------|-----------|----|----|
|                      |                                  |          |         | L         | M  | S  |
| <b>S</b>             | JS2014-39                        | JS       | 2014    | C2        | C2 | C4 |
|                      | HB2014-22                        | HB       | 2014    | C2        | C2 | C3 |
|                      | HBSZ55                           | HB       | 2017    | C2        | C2 | C3 |
|                      | YSC3                             | HN       | 2011    | C2        | C2 | C4 |
|                      | HYS_L-HZM                        | HYS      | Unknown | C3        | C3 | C2 |
|                      | NB38                             | ZJ       | 2013    | C4        | C4 | J2 |
|                      | HBHG38                           | HB       | 2017    | C4        | C4 | C3 |
|                      | JS2014- <i>H.longicornis</i> -01 | JS       | 2014    | J3        | J3 | J2 |
|                      | JS2011-69                        | JS       | 2011    | J3        | J3 | J2 |
|                      | JS2014-16                        | JS       | 2014    | J3        | J3 | J2 |
|                      | HB2014-31                        | HB       | 2014    | J3        | J3 | J2 |
|                      | HB2014-37                        | HB       | 2014    | J3        | J3 | J2 |
|                      | CB1                              | SK       | 2014    | J3        | J3 | J2 |
| <b>M</b>             | 2011YPQ12                        | HN       | 2012    | C2        | C4 | C2 |
|                      | LN2012-42                        | LN       | 2012    | C3        | C2 | C3 |
|                      | LN2012-34                        | LN       | 2012    | C3        | C2 | C3 |
|                      | LN2012-14                        | LN       | 2012    | C3        | C2 | C3 |
|                      | LN2012-41                        | LN       | 2012    | C3        | C2 | C3 |
|                      | 2011YSC60                        | HN       | 2011    | C4        | C2 | C4 |
| <b>L</b>             | 2011YSC45                        | HN       | 2011    | C2        | C3 | C3 |
|                      | LN2012-58                        | LN       | 2012    | C3        | C2 | C2 |
|                      | 2011YSC52                        | HN       | 2011    | C4        | C3 | C3 |
|                      | NB31                             | ZJ       | 2013    | C6        | J2 | J2 |
|                      | SPL100A                          | JA       | 2013    | C6        | J2 | J2 |
|                      | SPL097A                          | JA       | 2013    | C6        | J2 | J2 |
|                      | SPL057A                          | JA       | 2013    | C6        | J2 | J2 |
|                      | Rodent02                         | ZJ       | 2014    | C6        | J2 | J2 |
|                      | ZJ2013-06                        | ZJ       | 2013    | C6        | J2 | J2 |
|                      | NB24                             | ZJ       | 2013    | C6        | J2 | J2 |
|                      | NB39                             | ZJ       | 2014    | C6        | J2 | J2 |
|                      | Rodent01                         | ZJ       | 2014    | C6        | J2 | J2 |
| <b>L/M/S</b>         | AHL                              | AH       | 2011    | C5        | C4 | C3 |
|                      | KADGH4                           | SK       | 2013    | C6        | J1 | J2 |
|                      | ZJ2014-01                        | ZJ       | 2014    | C6        | J1 | J2 |
|                      | NB32                             | ZJ       | 2013    | C6        | C4 | J2 |

Unknown indicates that the isolation date of the strains were unclear.

HB-Hubei; JS-Jiangsu; HN-Henan; HYS-Huaiyangshan; ZJ-Zhejiang; LN-Liaoning; AH-Anhui; JA-Japan; SK-South Korea.

**Table S5.** SFTSV reassortment events, as determined by RDP package.

| Reassorted segment | Event | Reassorted sequence (L/M/S)                                                                     | Major parental sequence (L/M/S)           | Minor parental sequence (L/M/S)   | RDPRCS | Tools         |
|--------------------|-------|-------------------------------------------------------------------------------------------------|-------------------------------------------|-----------------------------------|--------|---------------|
| <b>S</b>           | 1     | HBSZ55_HB_2017<br>C2/C2/C3                                                                      | HBHG8_HB_2017<br>C3/C3/C3                 | HBSZ52_HB_2017<br>C2/C2/C2        | 0.738  | R,G,M,S,T     |
|                    | 2     | JS2014-39_JS_2014<br>C2/C2/C4                                                                   | JS2014-<br>Hedgehog01_JS_2014<br>C4/C4/C4 | JS2012-goat01_JS_2012<br>C2/C2/C2 | 0.743  | R,G,M,S,T     |
|                    | 3     | YSC3_HN_2011<br>C2/C2/C4                                                                        | YXX2_HN_2011<br>C4/C4/C4                  | ZL13-32_HN_2013<br>C2/C2/C2       | 0.708  | R,G,M,C,S,T   |
|                    | 4     | HYS_L-HZM_HYS<br>C3/C3/C2                                                                       | HYS_L-WWG-HYS<br>C2/C2/C2                 | 2012YSH9_HN_2012<br>C3/C3/C3      | 0.731  | R,G,B,M,C,S,T |
|                    | 5     | HBHG38_HB_2017<br>C4/C4/C3                                                                      | JS2013-71_JS_2013<br>C4/C4/C4             | HBHG8_HB_2017<br>C3/C3/C3         | 0.675  | R,G,B,M,C,S,T |
|                    | 6     | NB38_ZJ_2013<br>C4/C4/J2                                                                        | ZJ2013-07_ZJ_2013<br>C4/C4/C4             | NB31_ZJ_2013<br>C6/J2/J2          | 0.655  | G,B,M,C,S,T   |
| <b>M</b>           | 7     | 2011YSC60_HN_2011<br>C4/C2/C4                                                                   | HXXY_245_HN_2011<br>C2/C2/C2              | HL/Larvae/G2<br>C4/C4/C4          | 0.724  | R,G,B,M,C,S,T |
|                    | 8     | 2011YPQ12_HN_2012<br>C2/C4/C2                                                                   | 2012YSH107_HN_2012<br>C2/C2/C2            | HL/Larvae/G2<br>C4/C4/C4          | 0.746  | R,G,B,M,C,S,T |
|                    | 9     | LN2012-41_LN_2012<br>C3/C2/C3                                                                   | JS2011-062_JS_2012<br>C3/C3/C3            | BX-2010_HN_2010<br>C2/C2/C2       | 0.521  | R,G,B,M,C,S,T |
|                    |       | LN2012-42_LN_2012<br>C3/C2/C3<br>LN2012-34_LN_2012<br>C3/C2/C3<br>LN2012-14_LN_2012<br>C3/C2/C3 |                                           |                                   |        |               |
| <b>L</b>           | 10    | 2011YSC45_HN_2011<br>C2/C3/C3                                                                   | HXXY_31_HN_2011<br>C2/C2/C2               | 2011YSC52_HN_2011<br>C4/C3/C3     | 0.59   | R,G,B,M,S,T   |
|                    | 11    | 2011YSC52_HN_2011<br>C4/C3/C3                                                                   | HXXY_212_HN_2011<br>C3/C3/C3              | SFTS-38_HB_2017<br>C4/C4/C3       | 0.718  | R,G,B,M,S,T   |
|                    | 12    | LN2012-58_LN_2012<br>C3/C2/C2                                                                   | JS2011-062_JS_2012<br>C3/C3/C3            | LN2_LN_2010<br>C2/C2/C2           | 0.679  | R,G,B,M,C,S,T |
|                    | 13    | ZJ2013-06_ZJ_2013<br>C6/J2/J2                                                                   | SPL057A_JA_2013<br>C6/J2/J2               | Unknown(NB32_ZJ_2013)<br>C6/C4/J2 | 0.647  | R,G,M,C,T     |
| <b>L/M/S</b>       | 14    | AHL_AH_2011<br>C5/C4/C3                                                                         | Unknown(JS2013-<br>44_JS_2013) C2/C2/C2   | KASJH_SK_2013<br>C3/C3/C3         | 0.403  | R,G,B,M,C,S   |
|                    | 15    | NB32_ZJ_2013<br>C6/C4/J2                                                                        | NB39_ZJ_2014<br>C6/J2/J2                  | NB38_ZJ_2013<br>C4/C4/J2          | 0.735  | R,G,T         |

The strains listed in the table were named with format "Strains name\_Location\_Year". HYS\_L-HZM\_HYS and HYS\_L-WWG-HYS the isolation years were unclear.

**Table S6.** Migration routes occurred between provinces in China, Japan, and South Korea.

|    | One-way migration                                           | Two-way migration       |
|----|-------------------------------------------------------------|-------------------------|
| C1 | SD-HB<br>SD-JS<br>SK-SD                                     |                         |
| C2 | SD-HB<br>SD-JS<br>SK-SD<br>JA-HN<br>AH-SK<br>JS-HB<br>HB-LN | HB-HN<br>HB-AH          |
| C3 | HB-JX<br>HB-AH                                              | HB-SK<br>HB-HN<br>HB-SD |
| C4 | HB-JS<br>HB-AH<br>JS-LN<br>ZJ-JA<br>SK-JA                   | HB-HN<br>HB-SK<br>ZJ-SK |
| C5 | SK-HB<br>SK-JA                                              |                         |
| J1 |                                                             | SK-JA                   |
| J2 | SK-JA<br>SK-HB                                              | SK-JA                   |
| J3 | SK-HB<br>SK-ZJ<br>SK-JA                                     |                         |

SD, Shandong Province; HB, Hubei Province; JS, Jiangsu Province; SK, South Korea; JA, Japan; HN, Henan Province; AH, Anhui Province; LN, Liaoning Province; ZJ, Zhejiang Province.

**Table S7.** Amino acid variations identified in the SFTSV RdRp, GP, NSs, and NP proteins.

| Viral protein      | Positions | Properties of amino acids <sup>&amp;</sup> |          |             |             |
|--------------------|-----------|--------------------------------------------|----------|-------------|-------------|
|                    |           | Acidic                                     | Alkaline | Hydrophilic | Hydrophobic |
| <b>RdRp (n=44)</b> | 2         | D                                          |          | N           |             |
|                    | 11        |                                            |          | N/T/S       |             |
|                    | 128       |                                            |          | S/T         |             |
|                    | 140       |                                            |          | T           | A           |
|                    | 240       |                                            | R/K      |             |             |
|                    | 243       |                                            | R        | G           |             |
|                    | 249       | E                                          | K        |             |             |
|                    | 251       | E                                          | K        |             |             |
|                    | 284       |                                            |          | S/N         |             |
|                    | 307       |                                            | K/R      |             |             |
|                    | 314       | D                                          |          | G/S         |             |
|                    | 317       |                                            |          | S           | A           |
|                    | 343       |                                            |          | S/T         |             |
|                    | 352       |                                            |          | Y           | F           |
|                    | 381       |                                            |          |             | V/I         |
|                    | 389       | D                                          |          | G           |             |
|                    | 397       | E/D                                        |          |             |             |
|                    | 398       |                                            | K/R      |             |             |
|                    | 444       |                                            | K/R      |             |             |
|                    | 448       | E/D                                        |          |             |             |
|                    | 449       |                                            |          | T           | A           |
|                    | 453       |                                            |          | Y           | F           |

|                  |     |       |     |
|------------------|-----|-------|-----|
| 457              | E/D |       |     |
| 479              |     |       | I/V |
| 566              |     | Y     | F   |
| 586              | D/E |       |     |
| 828              |     | N/S   |     |
| 835              |     | R/K   |     |
| 884              |     | K/R   |     |
| 1008             |     | T     | A   |
| 1038             |     | S/T   |     |
| 1039             |     | K/R   |     |
| 1045             |     | S/T   |     |
| 1061             | E/D |       | V   |
| 1116             |     | N/S/C |     |
| 1199             |     |       | I/V |
| 1208             |     | T/S   |     |
| 1266             |     | T     | I   |
| 1433             |     | T     | A   |
| 1447             |     |       | I/V |
| 1659             |     |       | I/M |
| 1684             |     | R/K   |     |
| 1717             |     |       | V/I |
| 1825             |     | K/R   |     |
| 1837             |     |       | V/I |
| 1906             |     | K/R   |     |
| <b>GP (n=50)</b> |     |       | I/V |
|                  |     |       | F/L |



|     |   |     |       |       |
|-----|---|-----|-------|-------|
| 18  |   |     | S/G   |       |
| 21  |   |     | S/T   |       |
| 37  | D |     | N/G/S | A     |
| 83  |   |     | Y     | F     |
| 114 | E |     | G     |       |
| 150 |   |     | T/S   | I     |
| 218 |   | R   | G/S   |       |
| 272 | E | K/R |       |       |
| 273 |   |     | T     | A     |
| 337 |   |     |       | L/M   |
| 340 |   |     | N/S   |       |
| 341 |   |     | Q/S   | P     |
| 364 |   |     |       | I/V   |
| 385 |   |     | T/S   |       |
| 394 |   | H   | G     |       |
| 404 |   |     | T     | A     |
| 431 | D |     | N     |       |
| 434 | D |     | G     |       |
| 479 |   |     |       | I/V   |
| 491 |   |     |       | I/M/V |
| 495 |   |     |       | I/M   |
| 501 |   |     | T/S   | A     |
| 506 |   |     |       | M/V   |
| 525 |   | R   | G     |       |
| 529 |   | R/H | Q     |       |
| 532 |   |     |       | V/I   |

|            |     |     |     |
|------------|-----|-----|-----|
| 537        |     |     | A/V |
| 557        |     | T   | I/V |
| 562        |     | S/G |     |
| 577        |     | K/R |     |
| 581        | E   | G   |     |
| 587        |     |     | V/I |
| 662        |     | S   | P   |
| 727        |     | T   | A   |
| 801        |     |     | V/I |
| 852        |     | S/T | A/V |
| 926        |     | K/R |     |
| 934        |     | S/N |     |
| 960        |     | T/S | I   |
| 962        | R   | S   |     |
| 973        | R   | Q   |     |
| 984        | H/K | Q   |     |
| 988        |     | K/R |     |
| 1011       |     | T/S |     |
| 1053       |     |     | L/M |
| 1056       |     | S   | F   |
| 1058       |     |     | F/L |
| 1065       |     |     | V/I |
| NSs (n=17) | 7   | S/T | F   |
|            | 16  |     | L/M |
|            | 30  | Y   | F   |
|            | 38  |     | V/I |

|          |     |     |     |     |
|----------|-----|-----|-----|-----|
| 143      |     |     | G/S |     |
| 144      |     | R   | Q   |     |
| 145      |     | R/K |     |     |
| 172      |     |     | T   | I   |
| 201      |     |     | Y   |     |
| 207      |     |     | S   | P   |
| 235      |     |     |     | L/M |
| 238      | D/E |     |     |     |
| 239      | D/E |     |     |     |
| 245      |     | H   | Q   |     |
| 249      |     | H   | Y   |     |
| 264      |     |     |     | I/M |
| 276      | D   |     | N   |     |
| 281      |     | R/K |     |     |
| NP (n=2) | 52  | K/R |     |     |
|          | 95  | K/R |     |     |

<sup>&</sup>Sites using amino acids of different properties are shaded.
